# Supplementary material for: Challenges and Enablers for Smartphone Use by Persons With Vision Loss During the COVID-19 Pandemic: A Report of Two Case Studies
Source: Frontiers journal article supplement (doi:10.3389/fpubh.2022.912460), 2022-07-06

# Purposes, Challenges and Enablers for smartphone Use in persons with visual loss during the COVID-19 pandemic

Date: 10/03/2022

## A. General Information of Patient

|            |                            |                            |                                                                                                   |                 |                 |
|------------|----------------------------|----------------------------|---------------------------------------------------------------------------------------------------|-----------------|-----------------|
| Name:      | S/D/W                      | Age                        | Sex                                                                                               | Address (State) | *Education:     |
|            | Chattu Kushwaha            | 29                         | <input checked="" type="checkbox"/> 1) Male<br><input type="checkbox"/> 2) Female                 | Delhi           | PG, Hindi Litr. |
| Occupation | BCVA (R/E, in certificate) | BCVA (L/E, in certificate) | Diagnosis (in Certificate):                                                                       |                 |                 |
| 7          | PL-                        | PL-                        | <input checked="" type="checkbox"/> pthisis<br><input checked="" type="checkbox"/> Atrophic bulbi |                 |                 |

\*Occupation code: 1-Govt. Job, 2-Pvt. Job, 3-Shopkeeper, 4-Business, 5-Daily wages, 6-Homemaker, 7-Student

DISABILITY PERCENTAGE = 100%

## B. Please tell for what purposes do you use smartphone during the COVID-19 pandemic?

|                                                  | Yes=1, Not in my case=2               | Tick/Mention                                             | Enabling factors (Tick)                                      |
|--------------------------------------------------|---------------------------------------|----------------------------------------------------------|--------------------------------------------------------------|
| 1. Use for communication                         | <input checked="" type="checkbox"/> 1 | Friend, Family members, Teacher,                         | SMS, Voice call, Audio-visual call,                          |
| 2. For Health consultation                       | <input checked="" type="checkbox"/> 1 | Doctor, Pharmacist, health worker,                       | SMS, Voice call, Audio-visual call,                          |
| 3. For getting information on COVID-19           | <input checked="" type="checkbox"/> 1 | About spread/protection/prevention,                      | Newspaper, Youtube, News channel,                            |
| 4. Money transfer/payment                        | <input checked="" type="checkbox"/> 1 | Family, Friend, Shop, mobile bill/recharge,              | Gpay, Phonepe, Paytm,                                        |
| 5. For Online shopping/Tele shopping             | <input checked="" type="checkbox"/> 1 | Clothes, ration, mobile, vegetable, <u>Speaker, food</u> | Amazon, Flipkart, Blinkit, Bigbasket, <u>Zomato</u>          |
| 6. For Reading Print material                    | <input checked="" type="checkbox"/> 2 | Medicine/tablet/sanitizer/price tag,                     | Special apps,                                                |
| 7. For Entertainment                             | <input checked="" type="checkbox"/> 1 | Music, movie, TV shows,                                  | Youtube, Netflix, Amazon prime, <u>Tiktok, Wyny, Hotstar</u> |
| 8. For Color identification                      | <input checked="" type="checkbox"/> 1 | Red, green, blue,                                        | Special app, <u>Eye-Dpro</u>                                 |
| 9. For Money identification/Handling finance     | <input checked="" type="checkbox"/> 1 | While shopping/keeping/giving away,                      | Special app, <u>Mani</u>                                     |
| 10. Use for object identification                | <input checked="" type="checkbox"/> 2 | Shoe, bottle, canes, keys,                               | Special app,                                                 |
| 11. Use for Local transportation/booking         | <input checked="" type="checkbox"/> 1 | Colleges, Market, Hospital, Bank, Railway station,       | OLA, Uber, Rapido, Meru,                                     |
| 12. Indoor navigation (inside the building/home) | <input checked="" type="checkbox"/> 2 | Bathroom, kitchen, toilet, bedroom, stair, roof,         | Special app,                                                 |
| 13. Use for taking medicine                      | <input checked="" type="checkbox"/> 2 | Identification of medicine, Dose, expiry date,           | Special app,                                                 |
| 14. Use for Alarm/reminder                       | <input checked="" type="checkbox"/> 1 | Getting up, meeting, birthday, <u>Alexf</u>              | Special app, <u>Alarm</u>                                    |
| 15. Use as Online platform                       | <input checked="" type="checkbox"/> 1 | Classes/Meeting/group discussion,                        | Google meet, Zoom, Microsoft,                                |
| 16. Use as a Calculator                          | <input checked="" type="checkbox"/> 1 | Subtract, addition, divide, multiply,                    | Special app, <u>Calculator</u>                               |

17. Face recognition ☒ 2 Friend, peers, family member, \_\_\_\_\_ | Special app, \_\_\_\_\_
18. Social Media ☒ 1 Messaging, talking, chatting, \_\_\_\_\_ | Facebook, WhatsApp, Instagram, Telegram
19. Photography ☒ 1 Documents, Friends, Family members, \_\_\_\_\_ | Special app, Camera
20. Others if any Mail, Save Contact, Note Pad, Recorder, Call Recording

**C. Additional enabling factors that made possible or help you to use smartphones during lockdown/pandemic?**

|                                                   |                                                                                                     | (How frequently do you face/feel it)  |                         |                                       |                                                                           |
|---------------------------------------------------|-----------------------------------------------------------------------------------------------------|---------------------------------------|-------------------------|---------------------------------------|---------------------------------------------------------------------------|
|                                                   |                                                                                                     | 1. Very Important                     | 2. Moderately Important | 3. Important                          | 4. Not Important at all                                                   |
| Yes=1, Not in my case=2                           | Tick/Mention                                                                                        | Tick/Mention                          |                         |                                       |                                                                           |
| 1. Familiarity/user friendly of smartphones       | <input checked="" type="checkbox"/> 1 Samsung, Xiaomi, Apple, Vivo, Motorola, _____                 | 1                                     | 2                       | <input checked="" type="checkbox"/> 3 | 4                                                                         |
| 2. Use of screen reader                           | <input checked="" type="checkbox"/> 1 Talkback, Voiceover, _____                                    | <input checked="" type="checkbox"/> 1 | 2                       | 3                                     | 4                                                                         |
| 3. Available Wi-Fi/Data internet at home          | <input checked="" type="checkbox"/> 1 Airtel, Idea, Vodafone, Excitel, hotspot                      | <input checked="" type="checkbox"/> 1 | 2                       | 3                                     | 4                                                                         |
| 4. Regular power supplies/Power source at home    | <input checked="" type="checkbox"/> 1 Inverter, power bank, _____                                   | 1                                     | 2                       | 3                                     | <input checked="" type="checkbox"/> 4 - without net phone will (sani) Box |
| 5. Apps that can read bilingual/multiple language | <input checked="" type="checkbox"/> 1 Vocalizer, Eloquence Text to Speech app, _____                | <input checked="" type="checkbox"/> 1 | 2                       | 3                                     | 4                                                                         |
| 6. Understanding English                          | <input checked="" type="checkbox"/> 1 _____                                                         | 1                                     | 2                       | 3                                     | <input checked="" type="checkbox"/> 4                                     |
| 7. Getting help from on the use of smartphone     | <input checked="" type="checkbox"/> 1 Healthcare, Family, Peers, _____                              | 1                                     | 2                       | 3                                     | <input checked="" type="checkbox"/> 4                                     |
| 8. Financial supports from any other agency/NGO   | <input checked="" type="checkbox"/> 2 Govt. NGO, Pvt. NGO, Semi-govt. NGO, Intl. NGO, Family, Donor | 1                                     | 2                       | 3                                     | 4                                                                         |
| 9. Using headphone                                | <input checked="" type="checkbox"/> 1 For calling, education, talkback, voiceover, _____            | <input checked="" type="checkbox"/> 1 | 2                       | 3                                     | 4                                                                         |
| 10. Others if any _____                           |                                                                                                     |                                       |                         |                                       |                                                                           |

**During COVID-19 Pandemic**

**D. Challenges that you encountered, while using smartphone?**

(How frequently do you face/feel it)

- |                                                                              | Yes=1, No/Never=2                     | Tick/Mention                                              |
|------------------------------------------------------------------------------|---------------------------------------|-----------------------------------------------------------|
| 1. At the begging, have you ever felt hesitation or reluctant for smartphone | <input checked="" type="checkbox"/> 2 | Not applicable / Rarely / Sometimes / very often / always |
| 2. Unlocking the smartphones                                                 | <input checked="" type="checkbox"/> 2 | Not applicable / Rarely / Sometimes / very often / always |
| 3. My screen reader is slow                                                  | <input checked="" type="checkbox"/> 1 | Not applicable / Rarely / Sometimes / very often / always |

- |                                                                     |                                       |                                                           |                  |
|---------------------------------------------------------------------|---------------------------------------|-----------------------------------------------------------|------------------|
| 4. My special app is unresponsive                                   | <input checked="" type="checkbox"/> 2 | Not applicable / Rarely / Sometimes / very often / always |                  |
| 5. Not understanding the meaning of a specific sound                | <input checked="" type="checkbox"/> 2 | Not applicable / Rarely / Sometimes / very often / always |                  |
| 6. Frequent unintentional selection of icons                        | <input checked="" type="checkbox"/> 1 | Not applicable / Rarely / Sometimes / very often / always |                  |
| 7. Getting lost when using a specific app/icon                      | <input checked="" type="checkbox"/> 1 | Not applicable / Rarely / Sometimes / very often / always |                  |
| 8. Unable to find a specific website                                | <input checked="" type="checkbox"/> 1 | Not applicable / Rarely / Sometimes / very often / always |                  |
| 9. Facing problem for safe keeping (at home/office)                 | <input checked="" type="checkbox"/> 1 | Not applicable / Rarely / Sometimes / very often / always |                  |
| 10. Feeling difficulty in carrying around mobile phone              | <input checked="" type="checkbox"/> 2 | Not applicable / Rarely / Sometimes / very often / always |                  |
| 11. Shortage of money to repair damaged phone                       | <input checked="" type="checkbox"/> 1 | Not applicable / Rarely / Sometimes / very often / always |                  |
| 12. Facing problem for poor battery backup                          | <input checked="" type="checkbox"/> 1 | Not applicable / Rarely / Sometimes / very often / always |                  |
| 13. Facing problem with the design (not user friendly)              | <input checked="" type="checkbox"/> 1 | Not applicable / Rarely / Sometimes / very often / always | - Long Journey   |
| 14. Facing problem with my touch screen function                    | <input checked="" type="checkbox"/> 2 | Not applicable / Rarely / Sometimes / very often / always | - speaker below  |
| 15. Facing problem with microphone function                         | <input checked="" type="checkbox"/> 1 | Not applicable / Rarely / Sometimes / very often / always |                  |
| 16. Facing problem with speaker/loudspeaker function                | <input checked="" type="checkbox"/> 1 | Not applicable / Rarely / Sometimes / very often / always |                  |
| 17. Difficult to text entry with aloud voice                        | <input checked="" type="checkbox"/> 1 | Not applicable / Rarely / Sometimes / very often / always |                  |
| 18. Feeling general apps not working properly                       | <input checked="" type="checkbox"/> 1 | Not applicable / Rarely / Sometimes / very often / always |                  |
| 19. Feeling verbose (many voices output) from mobile                | <input checked="" type="checkbox"/> 1 | Not applicable / Rarely / Sometimes / very often / always |                  |
| 20. Facing unwanted add/advertisement when using app                | <input checked="" type="checkbox"/> 2 | Not applicable / Rarely / Sometimes / very often / always | - Ad Guard       |
| 21. Content or labels not readable with a screen reader/special app | <input checked="" type="checkbox"/> 1 | Not applicable / Rarely / Sometimes / very often / always | - captcha, Image |
| 22. Others if any <u>Emoji Reader</u>                               |                                       |                                                           |                  |

E. How much smartphones help in doing daily living activities without support from others (In percentage %)

.....80%..... % (0-100)

F. How much do you think smartphones is important for your life?

☒ 1. Very Important 2. Moderately Important 3. Important 4. Not Important at all

Name of Interviewer:

VIKA/ Dr. Suraj Singh Senjam

Signature of Interviewer:

*(Signature)*

**Purposes, Challenges and Enablers for smartphone Use in persons with visual loss during the COVID-19 pandemic**

**A. General Information of Patient**

Date: 10/03/2022

|                              |                                          |                                           |                                                                                                 |                                                |                                                                                                 |
|------------------------------|------------------------------------------|-------------------------------------------|-------------------------------------------------------------------------------------------------|------------------------------------------------|-------------------------------------------------------------------------------------------------|
| Name:                        | S/D/W<br><u>Netra Pal</u>                | Age<br><u>27</u>                          | Sex<br><input checked="" type="checkbox"/> 1 Male<br><input type="checkbox"/> 2 Female          | Address (State)<br><u>Delhi</u><br>Contact no: | *Education: <u>Graduate</u><br>Marital status: <input checked="" type="checkbox"/> 2 Yes=1 No=2 |
| Occupation<br><u>Banking</u> | BCVA (R/E, in certificate)<br><u>PL-</u> | BCVA (L/E, in certificate)<br><u>2/60</u> | Diagnosis (in Certificate):<br><u>R Anophthalmia</u><br><u>L Pseudophakia c Corneal opacity</u> |                                                |                                                                                                 |

\*Occupation code: 1-Govt. Job, 2-Pvt. Job, 3-Shopkeeper, 4-Business, 5-Daily wages, 6-Homemaker, 7-Student

DISABILITY PERCENTAGE = 90%  
(A/HMS)

**B. Please tell for what purposes do you use smartphone during the COVID-19 pandemic?**

|                                                  | Yes=1, Not in my case=2               | Tick/Mention                                           | Enabling factors (Tick)                                     |
|--------------------------------------------------|---------------------------------------|--------------------------------------------------------|-------------------------------------------------------------|
| 1. Use for communication                         | <input checked="" type="checkbox"/> 1 | Friend, Family members, Teacher,                       | SMS, Voice call, Audio-visual call,                         |
| 2. For Health consultation                       | <input checked="" type="checkbox"/> 1 | Doctor, Pharmacist, health worker,                     | SMS, Voice call, Audio-visual call,                         |
| 3. For getting information on COVID-19           | <input checked="" type="checkbox"/> 1 | About spread/protection/prevention,                    | Newspaper, Youtube, News channel, <u>Twitter</u>            |
| 4. Money transfer/payment                        | <input checked="" type="checkbox"/> 1 | Family, Friend, Shop, mobile bill/recharge, <u>Cab</u> | Gpay, Phonepe, Paytm,                                       |
| 5. For Online shopping/Tele shopping             | <input checked="" type="checkbox"/> 1 | Clothes, ration, mobile, vegetable,                    | Amazon, Flipkart, Blinkit, Bigbasket, <u>Swiggy, Meesho</u> |
| 6. For Reading Print material                    | <input checked="" type="checkbox"/> 1 | Medicine/tablet/sanitizer/price tag,                   | Special apps, <u>Envision AI</u>                            |
| 7. For Entertainment                             | <input checked="" type="checkbox"/> 1 | Music, movie, TV shows,                                | Youtube, Netflix, Amazon prime,                             |
| 8. For Color identification                      | <input checked="" type="checkbox"/> 2 | Red, green, blue,                                      | Special app,                                                |
| 9. For Money identification/Handling finance     | <input checked="" type="checkbox"/> 1 | While shopping/keeping/giving away,                    | Special app, <u>Kitna Mami</u>                              |
| 10. Use for object identification                | <input checked="" type="checkbox"/> 2 | Shoe, bottle, canes, keys,                             | Special app,                                                |
| 11. Use for Local transportation/booking         | <input checked="" type="checkbox"/> 1 | Colleges, Market, Hospital, Bank, Railway station,     | OLA, Uber, Rapido, Meru,                                    |
| 12. Indoor navigation (inside the building/home) | <input checked="" type="checkbox"/> 2 | Bathroom, kitchen, toilet, bedroom, stair, roof,       | Special app,                                                |
| 13. Use for taking medicine                      | <input checked="" type="checkbox"/> 1 | Identification of medicine, Dose, expiry date,         | Special app, <u>Envision AI</u>                             |
| 14. Use for Alarm/reminder                       | <input checked="" type="checkbox"/> 1 | Getting up, meeting, birthday, <u>Alert, Duty</u>      | Special app, <u>Alarm</u>                                   |
| 15. Use as Online platform                       | <input checked="" type="checkbox"/> 1 | Classes/Meeting/group discussion,                      | Google meet, Zoom, Microsoft, <u>cisco</u>                  |
| 16. Use as a Calculator                          | <input checked="" type="checkbox"/> 1 | Subtract, addition, divide, multiply,                  | Special app, <u>calculator with Talkback</u>                |



17. Face recognition ☒ 2 Friend, peers, family member, \_\_\_\_\_ Special app, \_\_\_\_\_
18. Social Media ☒ 1 Messaging, talking, chatting, \_\_\_\_\_ Facebook, WhatsApp, Instagram, \_\_\_\_\_
19. Photography ☒ 1 Documents, Friends, Family members, \_\_\_\_\_ Special app, Camera, Scanner
20. Others if any \_\_\_\_\_

**C. Additional enabling factors that made possible or help you to use smartphones during lockdown/pandemic?**

|                                                   | Yes=1, Not in my case=2                      | Tick/Mention                                                  | (How frequently do you face/feel it)         |                                              |                                              |                         |
|---------------------------------------------------|----------------------------------------------|---------------------------------------------------------------|----------------------------------------------|----------------------------------------------|----------------------------------------------|-------------------------|
|                                                   |                                              |                                                               | 1. Very Important                            | 2. Moderately Important                      | 3. Important                                 | 4. Not Important at all |
| 1. Familiarity/user friendly of smartphones       | <input checked="checked" type="checkbox"/> 1 | Samsung, Xiaomi, Apple, Vivo, Motorola, _____                 | 1                                            | <input checked="checked" type="checkbox"/> 2 | 3                                            | 4                       |
| 2. Use of screen reader                           | <input checked="checked" type="checkbox"/> 1 | Talkback, Voiceover, _____                                    | <input checked="checked" type="checkbox"/> 1 | 2                                            | 3                                            | 4                       |
| 3. Available Wi-Fi/Data internet at home          | <input checked="checked" type="checkbox"/> 1 | Airtel, Idea, Vodafone, Excitel, hotspot <u>Jio</u>           | <input checked="checked" type="checkbox"/> 1 | 2                                            | 3                                            | 4                       |
| 4. Regular power supplies/Power source at home    | <input checked="checked" type="checkbox"/> 1 | Inverter, power bank, _____                                   | 1                                            | 2                                            | <input checked="checked" type="checkbox"/> 3 | 4                       |
| 5. Apps that can read bilingual/multiple language | <input checked="checked" type="checkbox"/> 1 | Vocalizer, Eloquence Text to Speech app, _____                | <input checked="checked" type="checkbox"/> 1 | 2                                            | 3                                            | 4                       |
| 6. Understanding English                          | <input checked="checked" type="checkbox"/> 1 | _____                                                         | 1                                            | <input checked="checked" type="checkbox"/> 2 | 3                                            | 4                       |
| 7. Getting help from on the use of smartphone     | <input checked="checked" type="checkbox"/> 1 | Healthcare, Family, Peers, _____                              | <input checked="checked" type="checkbox"/> 1 | 2                                            | 3                                            | 4                       |
| 8. Financial supports from any other agency/NGO   | <input checked="checked" type="checkbox"/> 1 | Govt. NGO, Pvt. NGO, Semi-govt. NGO, Intl. NGO, Family, Donor | <input checked="checked" type="checkbox"/> 1 | 2                                            | 3                                            | 4 - Laptop              |
| 9. Using headphone                                | <input checked="checked" type="checkbox"/> 1 | For calling, education, talkback, voiceover, _____            | 1                                            | <input checked="checked" type="checkbox"/> 2 | 3                                            | 4                       |
| 10. Others if any                                 |                                              | _____                                                         |                                              |                                              |                                              |                         |

**During COVID-19 Pandemic**

**D. Challenges that you encountered, while using smartphone?**

(How frequently do you face/feel it)

- |                                                                              | Yes=1, No/Never=2                            | Tick/Mention                                              |
|------------------------------------------------------------------------------|----------------------------------------------|-----------------------------------------------------------|
| 1. At the begging, have you ever felt hesitation or reluctant for smartphone | <input checked="checked" type="checkbox"/> 1 | Not applicable / Rarely / Sometimes / very often / always |
| 2. Unlocking the smartphones                                                 | <input checked="checked" type="checkbox"/> 2 | Not applicable / Rarely / Sometimes / very often / always |
| 3. My screen reader is slow                                                  | <input checked="checked" type="checkbox"/> 1 | Not applicable / Rarely / Sometimes / very often / always |

- |                                                                     |                                                                                                 |
|---------------------------------------------------------------------|-------------------------------------------------------------------------------------------------|
| 4. My special app is unresponsive                                   | <input checked="" type="checkbox"/> 1 Not applicable / Rarely / Sometimes / very often / always |
| 5. Not understanding the meaning of a specific sound                | <input checked="" type="checkbox"/> 2 Not applicable / Rarely / Sometimes / very often / always |
| 6. Frequent unintentional selection of icons                        | <input checked="" type="checkbox"/> 1 Not applicable / Rarely / Sometimes / very often / always |
| 7. Getting lost when using a specific app/icon                      | <input checked="" type="checkbox"/> 1 Not applicable / Rarely / Sometimes / very often / always |
| 8. Unable to find a specific website                                | <input checked="" type="checkbox"/> 1 Not applicable / Rarely / Sometimes / very often / always |
| 9. Facing problem for safe keeping (at home/office)                 | <input checked="" type="checkbox"/> 1 Not applicable / Rarely / Sometimes / very often / always |
| 10. Feeling difficulty in carrying around mobile phone              | <input checked="" type="checkbox"/> 2 Not applicable / Rarely / Sometimes / very often / always |
| 11. Shortage of money to repair damaged phone                       | <input checked="" type="checkbox"/> 2 Not applicable / Rarely / Sometimes / very often / always |
| 12. Facing problem for poor battery backup                          | <input checked="" type="checkbox"/> 1 Not applicable / Rarely / Sometimes / very often / always |
| 13. Facing problem with the design (not user friendly)              | <input checked="" type="checkbox"/> 2 Not applicable / Rarely / Sometimes / very often / always |
| 14. Facing problem with my touch screen function                    | <input checked="" type="checkbox"/> 1 Not applicable / Rarely / Sometimes / very often / always |
| 15. Facing problem with microphone function                         | <input checked="" type="checkbox"/> 1 Not applicable / Rarely / Sometimes / very often / always |
| 16. Facing problem with speaker/loudspeaker function                | <input checked="" type="checkbox"/> 2 Not applicable / Rarely / Sometimes / very often / always |
| 17. Difficult to text entry with aloud voice                        | <input checked="" type="checkbox"/> 1 Not applicable / Rarely / Sometimes / very often / always |
| 18. Feeling general apps not working properly                       | <input checked="" type="checkbox"/> 1 Not applicable / Rarely / Sometimes / very often / always |
| 19. Feeling verbose (many voices output) from mobile                | <input checked="" type="checkbox"/> 1 Not applicable / Rarely / Sometimes / very often / always |
| 20. Facing unwanted add/advertisement when using app                | <input checked="" type="checkbox"/> 1 Not applicable / Rarely / Sometimes / very often / always |
| 21. Content or labels not readable with a screen reader/special app | <input checked="" type="checkbox"/> 1 Not applicable / Rarely / Sometimes / very often / always |
| 22. Others if any _____                                             |                                                                                                 |

E. How much smartphones help in doing daily living activities without support from others (In percentage %)

75-80 % (0-100)

F. How much do you think smartphones is important for your life?

☒ 1. Very Important 2. Moderately Important 3. Important 4. Not Important at all

Name of Interviewer: VIKAS

Signature of Interviewer: 

Supplement: Data_Sheet_1.PDF [file Data_Sheet_1.PDF]
